# Supplementary material for: Injectable adhesive carboxymethyl chitosan-based hydrogels with self-mending and antimicrobial features for the potential management of periodontal diseases
Source: Royal Society of Chemistry journal article supplement (doi:10.1039/d3ra00904a), 2023-01-01
Supplement: d3ra00904a1.pdf [file d3ra00904a1.pdf]

# **Injectable Adhesive Carboxymethyl Chitosan-based Hydrogels with Self-mending and Antimicrobial Features for the Potential Management of Periodontal Disease**

Xiaoqian Lin<sup>1</sup>, Jia Lv<sup>2</sup>, Desheng Wang<sup>3</sup>, Kaikai Liu <sup>\*4</sup>

## **Author Affiliations:**

<sup>1</sup> Department of Pharmacy, Qilu Hospital (Qingdao), Cheeloo College of Medicine, Shandong University, Qingdao, Shandong, China

<sup>2</sup> Department of Prosthodontics, Qilu Hospital, Cheeloo College of Medicine, and Institute of Stomatology, Shandong University, Jinan, Shandong, China

<sup>3</sup> Jinan Stomatological Hospital, Jinan, Shandong, China.

<sup>4</sup> Department of Stomatology, Qilu Hospital (Qingdao), Cheeloo College of Medicine, Shandong University, Qingdao, Shandong, China

\*Corresponding author:

Kaikai Liu, Email: lkkqlly@163.com

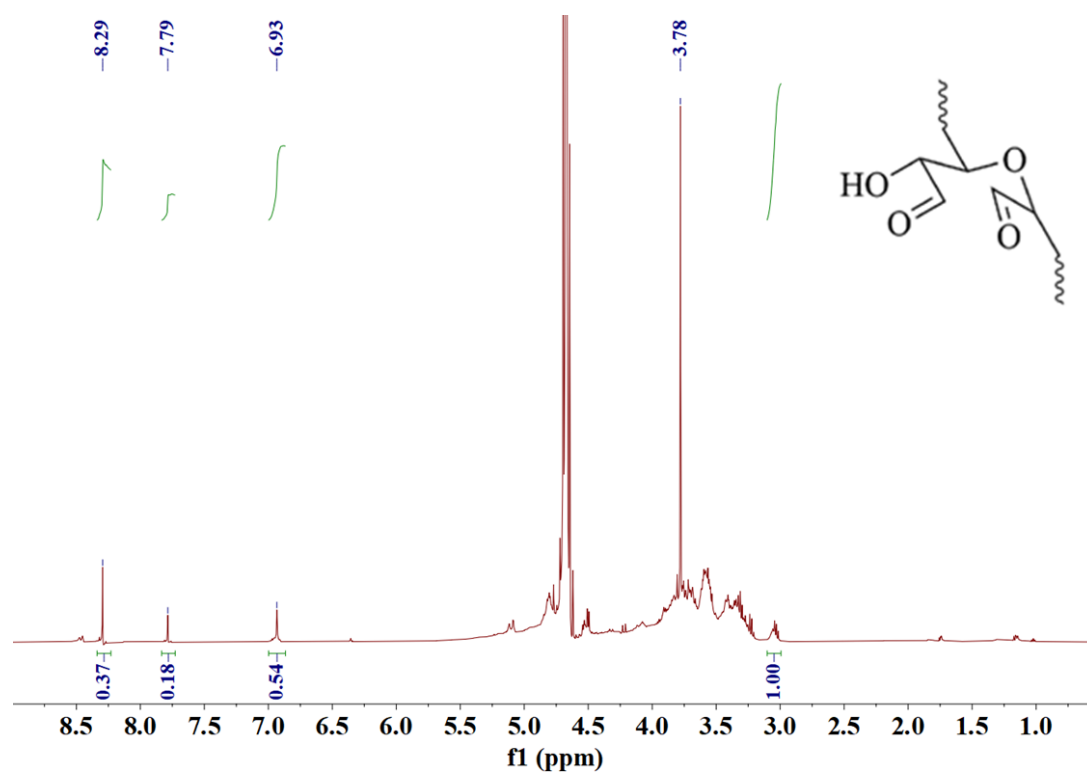

**Figure S1.**  $^1\text{H}$  NMR spectra of PDA under alkaline condition (pH=13).

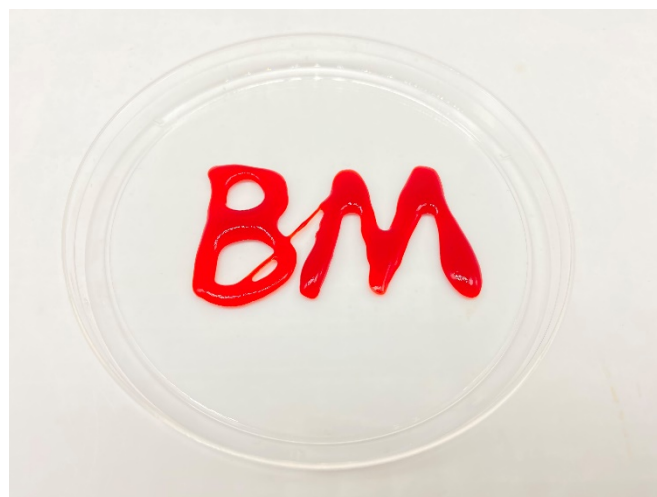

**Figure S2.** Injectable ability of CPM hydrogels.
